# Supplementary material for: Lignin-based sustainable antifungal gel nanocoatings for disinfecting biomedical devices
Source: Royal Society of Chemistry journal article supplement (doi:10.1039/d4su00180j), 2024-01-01
Supplement: d4su00180j1.pdf [file d4su00180j1.pdf]

**Supporting Information for**  
**Lignin-Based Sustainable Antifungal Gel Nanocoatings for**  
**Disinfecting Biomedical Devices**

Sanjam Chandna,<sup>a,b,§</sup> Kunal Gogde,<sup>a,c</sup> Shatabdi Paul<sup>a,d,#</sup> and Jayeeta Bhaumik<sup>a,\*</sup>

<sup>a</sup>Center of Innovative and Applied Bioprocessing (CIAB), Department of Biotechnology  
(DBT), Government of India, Sector 81 (Knowledge City), S.A.S. Nagar 140306, Punjab,  
India

<sup>b</sup>Department of Microbial Biotechnology, Panjab University, South Campus, Sector 25,  
Chandigarh 160036, India

<sup>c</sup>University Institute of Pharmaceutical Sciences, Panjab University, Sector 14,  
Chandigarh 160014, India

<sup>d</sup>Regional Centre of Biotechnology, Faridabad 121001, Haryana, India

\*Corresponding author's email [jayeeta@ciab.res.in](mailto:jayeeta@ciab.res.in), [jbhaumi@gmail.com](mailto:jbhaumi@gmail.com)

§Present Address: Institute of Chemistry and Biochemistry, Freie Universität Berlin,  
14195 Berlin, Germany

#Present Address: Department of Pharmaceutical Technology (Process Chemistry), National Institute  
of Pharmaceutical Education and Research, S.A.S. nagar 160062, Punjab, India

## Table of Contents

|                                                                                                               |    |
|---------------------------------------------------------------------------------------------------------------|----|
| Instrumentation and Methods.....                                                                              | S2 |
| Materials and Chemicals. ....                                                                                 | S2 |
| Table S1. Elemental Analysis of bare lignin and lignin gel coating.....                                       | S3 |
| Table S2. Antimicrobial Photodynamic Therapeutic Efficacy of the Photodynamic Lignin-based Nanocoatings ..... | S4 |

## Instrumentation and Methods.

The UV-Vis spectra were recorded on Shimadzu UV-2600. FT-IR analysis was done on an FT-IR spectrophotometer with ATR analysis (Agilent; Cary 600 series). The rheology of gel coating was performed using a Discovery HR-2 hybrid rheometer (TA instruments). Fluorescence microscopy was done using inverted fluorescence microscopy (Nikon; TS2FL). The size and zeta potential of nanoconjugates were measured by zeta sizer (Malvern; Nano 25) at CIAB Mohali.

## Materials and Chemicals.

Alkali lignin, silver nitrate, 1-ethyl-3-(3-dimethylaminopropyl) carbodiimide (EDC), polyacrylic acid (PAA), polyvinyl alcohol (PVA), rose Bengal, potassium persulphate, 1,3-diphenylisobenzofuran (DPBF), DAPI and propidium iodide (PI) were purchased from Sigma Aldrich. N-(2-hydroxyethyl) piperazine-N'-(2-ethanesulfonic acid) (HEPES), phosphate buffered saline (PBS), Luria Bertani broth, agar, agarose, malt extract, glucose, yeast extract, and peptone extract were procured from HiMedia Laboratories Pvt. Ltd. Sodium hydroxide was purchased from Central Drug House Pvt. Ltd. All the stock solutions were prepared in deionized water (collected from Merck Millipore system present in CIAB. The yeast strain *Candida tropicalis* (MTCC 6192) and bacterial strain *E. coli* (BL21) were procured from microbial type cell culture (MTCC), CSIR-IMTECH, Chandigarh (India).

**Table S1.** Elemental Analysis of bare lignin and lignin gel coating

| <b>Sample</b>      | <b>%C</b> | <b>%H</b> | <b>%N</b> | <b>%S</b> |
|--------------------|-----------|-----------|-----------|-----------|
| Bare lignin        | 57.9      | 15.6      | 1.5       | 2.7       |
| Lignin Gel Coating | 52.5      | 12.3      | 0.94      | 2.5       |

**Table S2.** Antimicrobial Photodynamic Therapeutic Efficacy of the Photodynamic Lignin-based Nanocoatings

| <b>Samples</b>     | <b>Percentage survival<br/>(<i>C. tropicalis</i>) in dark<br/>conditions</b> | <b>Percentage survival<br/>(<i>C. tropicalis</i>) in light<br/>conditions</b> |
|--------------------|------------------------------------------------------------------------------|-------------------------------------------------------------------------------|
| Control            | 100.00 ± 0.00                                                                | 97.00 ± 7.02                                                                  |
| Lignin gel coating | 93.01 ± 7.010                                                                | 88.02 ± 8.30                                                                  |
| RB                 | 99.05 ± 9.34                                                                 | 74.60 ± 2.23                                                                  |
| Lig-coat-RB        | 91.00 ± 6.10                                                                 | 69 ± 6.82                                                                     |
| AgLNCs             | 56.80 ± 6.89                                                                 | 49.89 ± 2.19                                                                  |
| Lig_coat-AgLNCs    | 51.00 ± 9.59                                                                 | 43.91 ± 4.10                                                                  |
| RB@AgLNCs          | 53.45 ± 7.4                                                                  | 15.84 ± 2.21                                                                  |
| Lig-coat-RB@AgLNCs | 42.67 ± 3.65                                                                 | 8.54 ± 0.93                                                                   |
